# Supplementary material
Source: publisher figshare collection journal article supplement (https://karger.figshare.com/articles/dataset/_/5368549)
Supplement: Supplementary file 1 [file 1]

Archive with 3 entries (3 files):
- JIN479100_FigS1.pdf
- JIN479100_FigS2.pdf
- JIN479100_FigS3.pdf
