# Supplementary material
Source: publisher figshare collection journal article supplement (https://karger.figshare.com/articles/dataset/_/5368549)
Supplement: Supplementary file 1 [file 1 › JIN479100_FigS1.pdf]

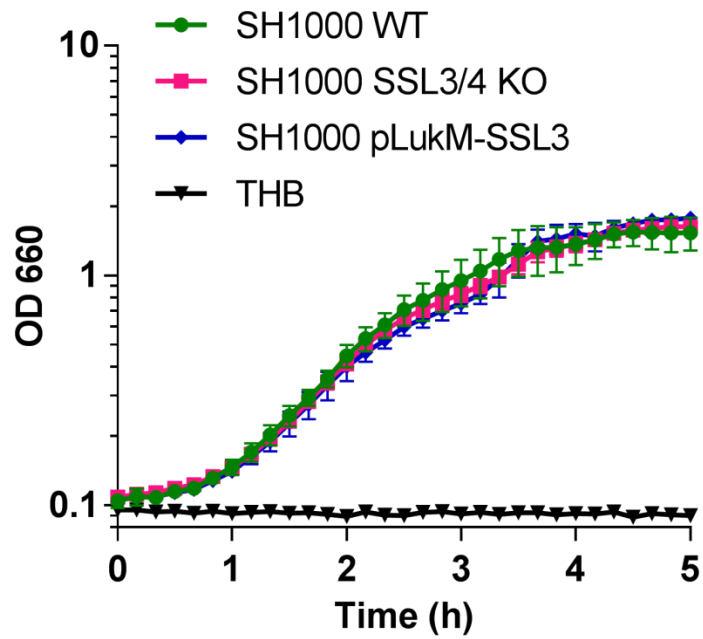

**Figure S1. Growth curves of SH1000 WT, SSL3/4 KO, and pLukM-SSL3 strains are similar.** Bacteria were grown for 5 h in THB medium and OD660 was measured every 10 minutes. Average OD plus SD of three independent experiments is shown for each strain.
