# Supplementary material
Source: publisher figshare collection journal article supplement (https://karger.figshare.com/articles/dataset/_/5368549)
Supplement: Supplementary file 1 [file 1 › JIN479100_FigS2.pdf]

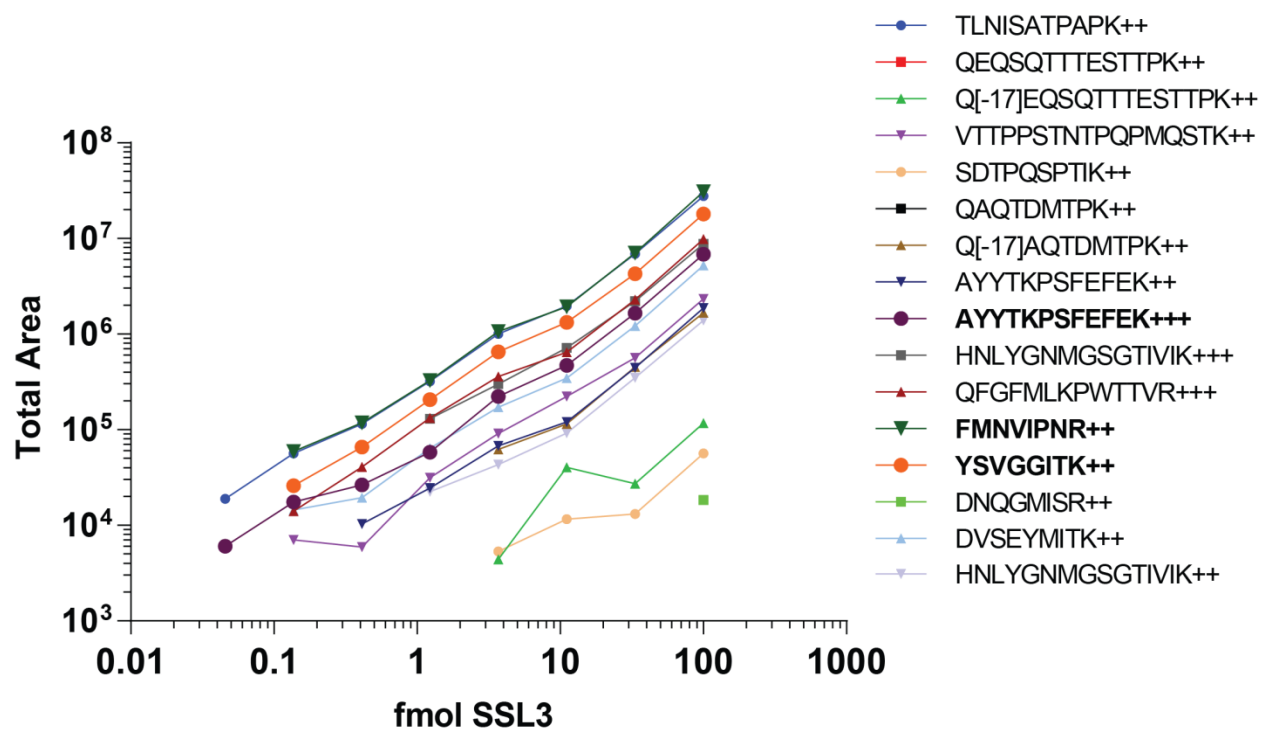

**Figure S2. SSL3 peptide response curves.** Dilution curve of SSL3 peptides spiked in human plasma backgrounds (1  $\mu\text{g}$  on column) at concentrations ranging from ~100 fmol to ~5 amol SSL3 on column and analyzed with SRM-MS targeting peptides previously detected with shotgun MS. The peptide total area is calculated by summing the area-under-the curve of all transitions per precursor ion. The plus signs (+) indicates peptide charge state and numbers within brackets ([ ]) indicate mass change (modification) of the preceding amino acid residue. The three selected peptide sequences are shown in *bold*.
