# Supplementary material
Source: publisher figshare collection journal article supplement (https://karger.figshare.com/articles/dataset/_/5368549)
Supplement: Supplementary file 1 [file 1 › JIN479100_FigS3.pdf]

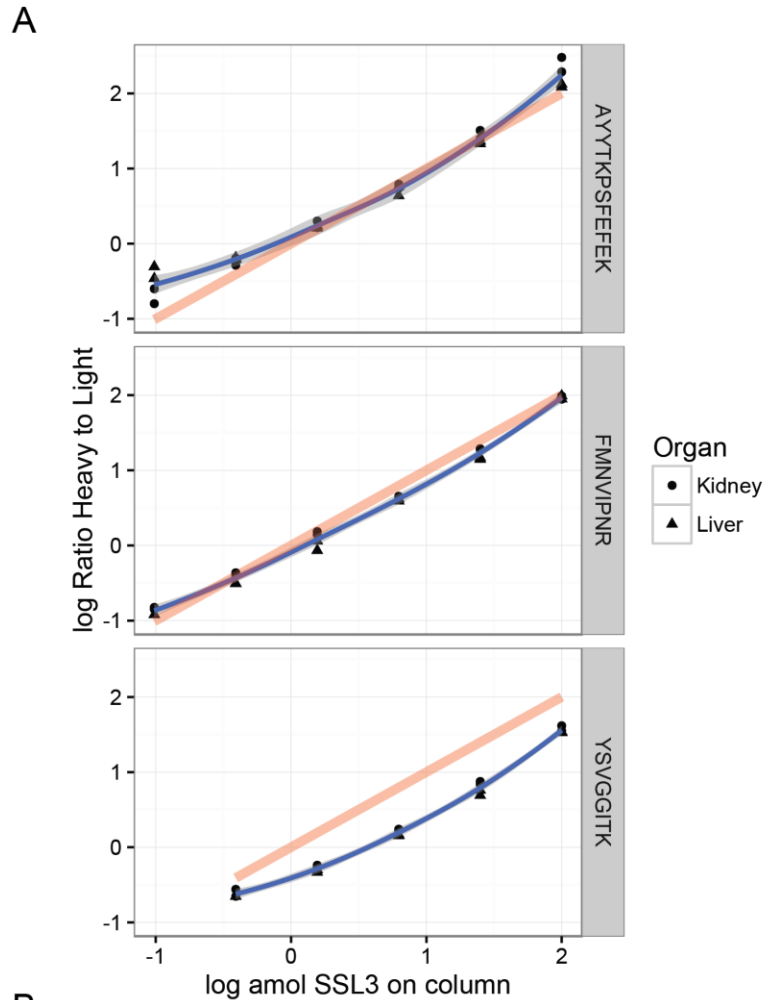

**B**

| Peptide      | Transition.id | LOD (fmol/μL) | LLOQ (fmol/μL) |
|--------------|---------------|---------------|----------------|
| AYYTKPSFEFEK | 3.y7.1.0      | 0.195         | 0.585          |
| FMNVIPNR     | 2.y6.1.0      | 0.237         | 0.712          |
| YSVGITK      | 2.y6.1.0      | 0.181         | 0.542          |

**Figure S3. Detection and quantification limits of chosen peptides.** (A) Calibration curves of SSL3 in mouse liver (*circles*) and kidney (*triangles*) backgrounds. SSL3 protein (serial dilution ranging from ~100 fmol to ~1.5 amol per μg mouse tissue) and stable isotope-labeled peptides (0.5 fmol peptide per μg mouse tissue) were added to the samples before trypsin digestion and desalting. The peptide heavy and light peptides intensities were measured using SRM-MS. (B) The lower limit of quantitation (LLOQ) and limit of detection (LOD) of respective peptides was determined by the QuaSAR software [46].

[46] Mani DR, Abbatiello SE, Carr SA: Statistical characterization of multiple-reaction monitoring mass spectrometry (MRM-MS) assays for quantitative proteomics. BMC Bioinformatics 2012; 13:S9.
